# Supplementary material for: Heterotrimetallic Ni2Ln2Fe3 chain complexes based on [Fe(1-CH3im)(CN)5]2−
Source: Royal Society of Chemistry journal article supplement (doi:10.1039/d1dt00693b), 2021-01-01
Supplement: d1dt00693b1.pdf [file d1dt00693b1.pdf]

## Electronic Supplementary Materials

### Heterotrimetallic Ni<sub>2</sub>Ln<sub>2</sub>Fe<sub>3</sub> chain complexes based on [Fe(1-CH<sub>3</sub>im)(CN)<sub>5</sub>]<sup>2-</sup>

Min Zeng,<sup>a</sup> Kong-Qiu Hu,<sup>a</sup> Cai-Ming Liu<sup>b</sup> and Hui-Zhong Kou<sup>a,\*</sup>

<sup>a</sup> Chemistry of Department, Tsinghua University, Beijing 100084, P. R. China

<sup>b</sup> Beijing National Laboratory for Molecular Sciences, Center for Molecular Science,  
Institute of Chemistry, Chinese Academy of Sciences, Beijing 100190, P. R. China.

## Materials and Methods

All reagents were purchased from commercial sources and used without further purification.

### Physical measurement

Elemental analyses (C, H, and N) were performed on a Carlo Erballo elemental analyzer. IR spectra were measured on a WQF-510A Fourier transform infrared spectrometer. PXRD measurements were recorded on a Bruker D8 ADVANCE X-ray diffractometer. The sweeping speed is 10°/min in the range of 5–50°. Single-crystal X-ray data were collected on a Rigaku Saturn724+ (2x2 bin mode) diffractometer. The structures were solved by direct methods and refined with full-matrix least squares on F<sup>2</sup> using the *SHELXTL-2013* program package. Magnetic measurements were recorded on a Quantum Design MPMS-XL5 SQUID magnetometer. The experimental susceptibilities were corrected for diamagnetism of Pascal's constants.

### Synthesis of precursor Ni(valpn)

1,3-diamopropane (1.48 g, 20 mmol) and triethylamine (4.04g, 40 mmol) was added into a 100 mL tetrahydrofuran (THF) solution of o-vanillin (6.08 g, 40 mmol) with stirring for 30 minutes. Then, Ni(NO<sub>3</sub>)<sub>2</sub>·6H<sub>2</sub>O (5.82 g, 20 mmol) was added into the abovementioned solution. After the stirring was continued for 1 hour, 400 mL deionized water was added to obtain green precipitation. The resulting precipitation was then filtered, washed, and dried to obtain Ni(valpn).

### Synthesis of [Ca(1-CH<sub>3</sub>im)(H<sub>2</sub>O)][Fe(CN)<sub>5</sub>(1-CH<sub>3</sub>im)]

1-methyl imidazole (1-CH<sub>3</sub>im, 12.5 g, 15mmol) was added into the 250 mL aqueous solution of Na<sub>3</sub>[Fe(CN)<sub>5</sub>(NH<sub>3</sub>)]·3H<sub>2</sub>O (10 g, 3 mmol) with stirring. The pH of the solution was then adjusted to 7-8 with HCl solution. Then, 7.5 mL H<sub>2</sub>O<sub>2</sub> (30%) was added to above solution. 1 hour later, equal volume saturated solution of CaCl<sub>2</sub> was added. The resulting solution was then filtered and evaporated to obtain red powders.

### Synthesis of complexes 1 and 2

*[Ni(valpn)Gd(DMF)<sub>2.5</sub>(H<sub>2</sub>O)<sub>0.5</sub>]<sub>2</sub>[Fe(1-CH<sub>3</sub>im)(CN)<sub>5</sub>]<sub>3</sub>·4DMF·15H<sub>2</sub>O (1):*

Ni(valpn) (43.5mg, 0.1mmo) and Gd(NO<sub>3</sub>)<sub>3</sub>·6H<sub>2</sub>O (46 mg, 0.1 mmol) was dissolved in 10 mL MeCN, and [Ca(1-CH<sub>3</sub>im)(H<sub>2</sub>O)][Fe(CN)<sub>5</sub>(1-CH<sub>3</sub>im)] (41 mg, 0.1 mmol) was added into abovementioned solution to obtain a red-brown precipitate. Then, a small amount of DMF solution was added to dissolve the precipitate. The resulting solution was then filtered and evaporated for several weeks to obtain red-brown plate crystals. Yield: 65%. Anal. Calcd (%) for C<sub>92</sub>H<sub>153</sub>Fe<sub>3</sub>Gd<sub>2</sub>N<sub>34</sub>Ni<sub>2</sub>O<sub>33</sub>: C, 38.60; H, 5.39; N, 16.63. Found: C, 39.1; H, 5.2; N, 16.6. IR (cm<sup>-1</sup>) : ν(C≡N) 2116, 2133.

*[Ni(valpn)Dy(DMF)<sub>2.5</sub>(H<sub>2</sub>O)<sub>0.5</sub>]<sub>2</sub>[Fe(1-CH<sub>3</sub>im)(CN)<sub>5</sub>]<sub>3</sub>·4DMF·12H<sub>2</sub>O (2):*

The preparation procedure of complex **2** is similar to that for **1**, except using Dy(NO<sub>3</sub>)<sub>3</sub>·6H<sub>2</sub>O (45 mg, 0.1 mmol) instead of Gd(NO<sub>3</sub>)<sub>3</sub>·6H<sub>2</sub>O. Yield: 67%. Anal. Calcd (%) for C<sub>92</sub>H<sub>147</sub>Dy<sub>2</sub>Fe<sub>3</sub>N<sub>34</sub>Ni<sub>2</sub>O<sub>30</sub>: C, 39.19; H, 5.25; N, 16.89. Found: C, 38.9; H, 5.3; N, 16.3. IR (cm<sup>-1</sup>) ν(C≡N): 2112, 2130.

**Table S1.** Crystal and structure refinement parameters for complexes **1-2**

|                                           | <b>1</b>                                                                                                         | <b>2</b>                                                                                                         |
|-------------------------------------------|------------------------------------------------------------------------------------------------------------------|------------------------------------------------------------------------------------------------------------------|
| formula                                   | C <sub>92</sub> H <sub>153</sub> Fe <sub>3</sub> Gd <sub>2</sub> N <sub>34</sub> Ni <sub>2</sub> O <sub>33</sub> | C <sub>92</sub> H <sub>147</sub> Dy <sub>2</sub> Fe <sub>3</sub> N <sub>34</sub> Ni <sub>2</sub> O <sub>30</sub> |
| Fw                                        | 2862.94                                                                                                          | 2817.38                                                                                                          |
| T/K                                       | 153.0                                                                                                            | 153.0                                                                                                            |
| crystal system                            | Monoclinic                                                                                                       | Monoclinic                                                                                                       |
| space group                               | C2/c                                                                                                             | C2/c                                                                                                             |
| <i>a</i> /Å                               | 26.933(3)                                                                                                        | 26.924(5)                                                                                                        |
| <i>b</i> /Å                               | 13.0976(15)                                                                                                      | 13.097(3)                                                                                                        |
| <i>c</i> /Å                               | 39.297(5)                                                                                                        | 39.319(8)                                                                                                        |
| $\beta$ /°                                | 101.425(2)                                                                                                       | 100.35(3)                                                                                                        |
| <i>V</i> /Å <sup>3</sup>                  | 13588(5)                                                                                                         | 13639(5)                                                                                                         |
| <i>Z</i>                                  | 4                                                                                                                | 4                                                                                                                |
| $\rho_{\text{calcd}}$ /g cm <sup>-3</sup> | 1.400                                                                                                            | 1.373                                                                                                            |
| $\mu$ (MoKa)/ mm <sup>-1</sup>            | 1.622                                                                                                            | 1.736                                                                                                            |
| F(000)                                    | 5876                                                                                                             | 5772                                                                                                             |
| Ref [I > 2 $\sigma$ ]                     | 11446                                                                                                            | 13654                                                                                                            |
| GOF                                       | 1.180                                                                                                            | 1.105                                                                                                            |
| R1 [I > 2 $\sigma$ (I)] <sup>a</sup>      | 0.0930                                                                                                           | 0.0664                                                                                                           |
| wR2 (all data) <sup>b</sup>               | 0.2065                                                                                                           | 0.1611                                                                                                           |
| CCDC                                      | 2058041                                                                                                          | 2058042                                                                                                          |

$$^a R1 = \sum ||F_o| - |F_c|| / \sum |F_o|. \quad ^b wR2 = \left\{ \frac{\sum [w(F_o^2 - F_c^2)^2]}{\sum [w(F_o^2)^2]} \right\}^{1/2}$$

**Table S2.** Selected bond length (Å) and angles (°) for complexes **1-2**

|            | <b>1</b> (Gd <sub>2</sub> Fe <sub>3</sub> Ni <sub>2</sub> ) | <b>2</b> (Dy <sub>2</sub> Fe <sub>3</sub> Ni <sub>2</sub> ) |              | <b>1</b> (Gd <sub>2</sub> Fe <sub>3</sub> Ni <sub>2</sub> ) | <b>2</b> (Dy <sub>2</sub> Fe <sub>3</sub> Ni <sub>2</sub> ) |
|------------|-------------------------------------------------------------|-------------------------------------------------------------|--------------|-------------------------------------------------------------|-------------------------------------------------------------|
| Ln1–O2     | 2.269(6)                                                    | 2.258(4)                                                    | Ni1–N1       | 2.111(9)                                                    | 2.105(5)                                                    |
| Ln1–O1     | 2.312(6)                                                    | 2.289(3)                                                    | Fe1–C29      | 1.922(10)                                                   | 1.925(6)                                                    |
| Ln1–O5     | 2.334(7)                                                    | 2.293(4)                                                    | Fe1–C26      | 1.946(11)                                                   | 1.944(6)                                                    |
| Ln1–O6     | 2.329(8)                                                    | 2.312(4)                                                    | Fe1–C22      | 1.935(12)                                                   | 1.949(6)                                                    |
| Ln1–O1W/O7 | 2.360(8)                                                    | 2.306(5)                                                    | Fe1–C27      | 1.946(10)                                                   | 1.947(5)                                                    |
| Ln1–N5A    | 2.463(8)                                                    | 2.456(4)                                                    | Fe1–C21      | 1.958(10)                                                   | 1.957(6)                                                    |
| Ln1–O4     | 2.571(6)                                                    | 2.550(4)                                                    | Fe1–N6       | 1.967(7)                                                    | 1.979(4)                                                    |
| Ln1–O3     | 2.612(6)                                                    | 2.587(4)                                                    | Fe2–C47      | 1.949(17)                                                   | 1.880(14)                                                   |
| Ni1–N8     | 2.023(8)                                                    | 2.028(4)                                                    | Fe2–C9       | 1.935(12)                                                   | 1.942(7)                                                    |
| Ni1–O2     | 2.040(6)                                                    | 2.033(3)                                                    | Fe2–C41      | 1.939(17)                                                   | 1.898(13)                                                   |
| Ni1–O1     | 2.039(7)                                                    | 2.044(4)                                                    | Fe2–C31      | 1.951(17)                                                   | 1.965(13)                                                   |
| Ni1–N9     | 2.054(9)                                                    | 2.049(5)                                                    | Fe2–N14      | 1.95(2)                                                     | 2.026(11)                                                   |
| Ni1–N10    | 2.111(9)                                                    | 2.098(5)                                                    | Ln1---Ni1    | 3.4433(13)                                                  | 3.4241(10)                                                  |
| Fe1–C21–N3 | 178.7(9)                                                    | 178.1(5)                                                    | Fe2–C9–N10   | 174.9(10)                                                   | 176.3(6)                                                    |
| Fe1–C22–N2 | 179.5(11)                                                   | 178.3(5)                                                    | Fe2–C31–N13  | 176(2)                                                      | 176.3(13)                                                   |
| Fe1–C26–N1 | 173.0(8)                                                    | 173.4(4)                                                    | Fe2–C41–N16  | 176(3)                                                      | 173(2)                                                      |
| Fe1–C27–N5 | 174.8(9)                                                    | 175.1(5)                                                    | Fe2–C47–N19  | 177(4)                                                      | 175(2)                                                      |
| Fe1–C29–N4 | 177.6(9)                                                    | 177.9(5)                                                    | C27A–N5A–Dy1 | 164.7(7)                                                    | 164.7(4)                                                    |
| C26–N1–Ni1 | 154.9(7)                                                    | 153.6(4)                                                    | C9–N10–Ni1   | 157.3(9)                                                    | 156.1(5)                                                    |
| Ni1–O1–Ln1 | 104.5(3)                                                    | 104.26(14)                                                  | Ni1–O2–Ln1   | 105.9(3)                                                    | 105.75(16)                                                  |

Symmetry code: A –x, 3-y, 1-z

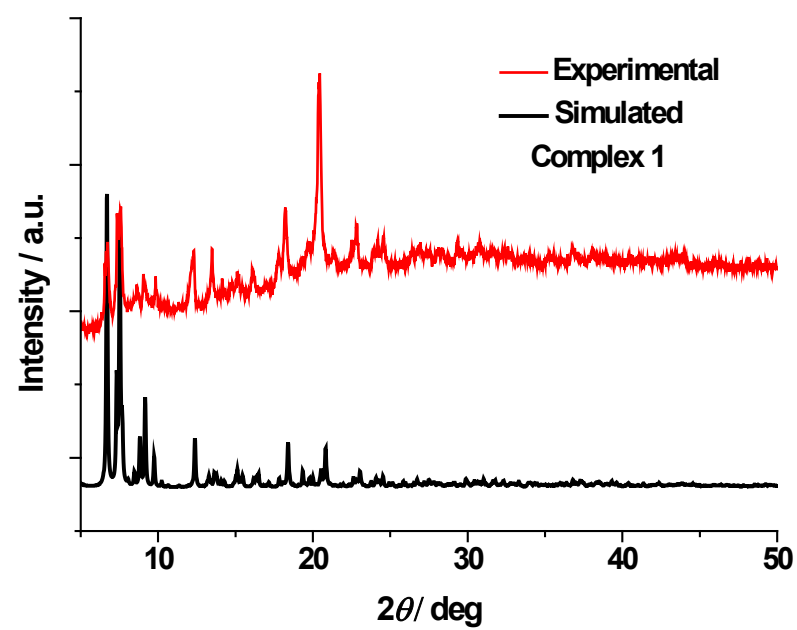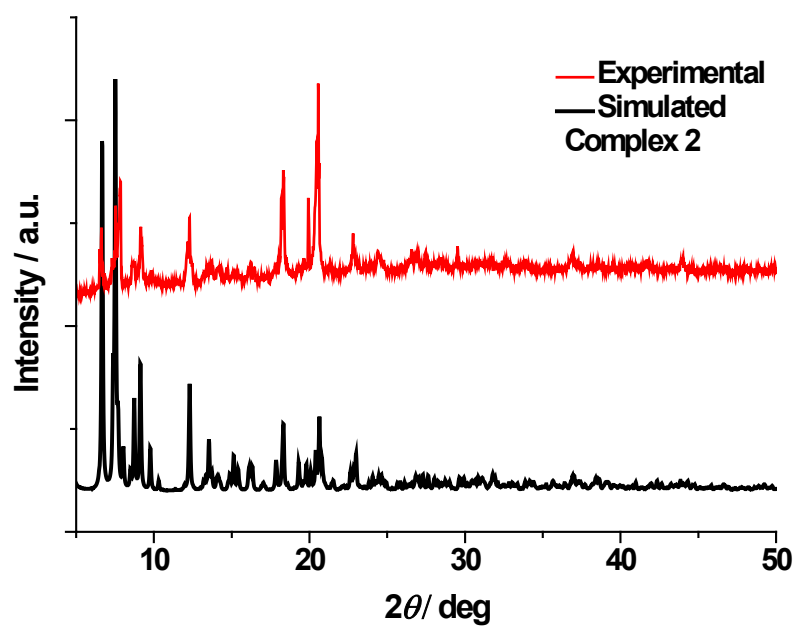

Fig. S1. PXRD patterns for complexes 1 and 2.

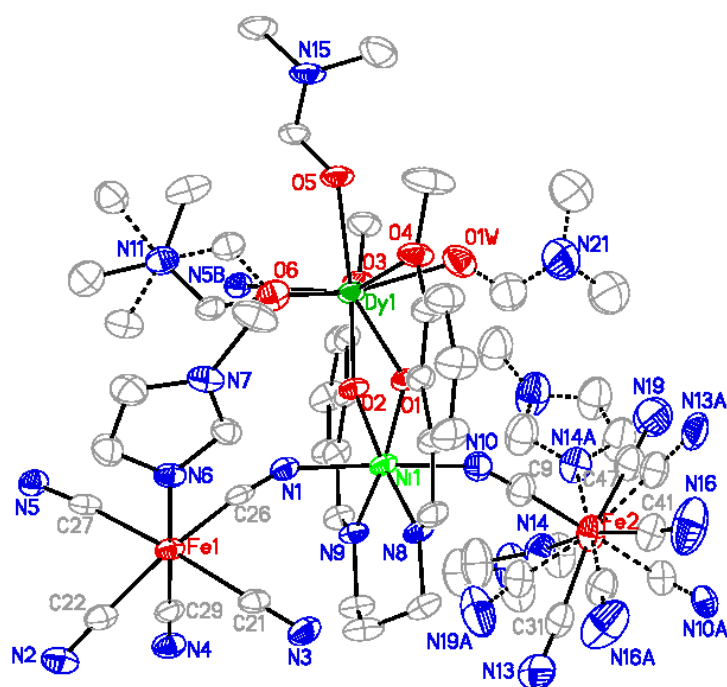

Fig. S2. ORTEP drawing for complex 2 showing 30% probability thermal ellipsoids. The dotted lines represent the disorder.

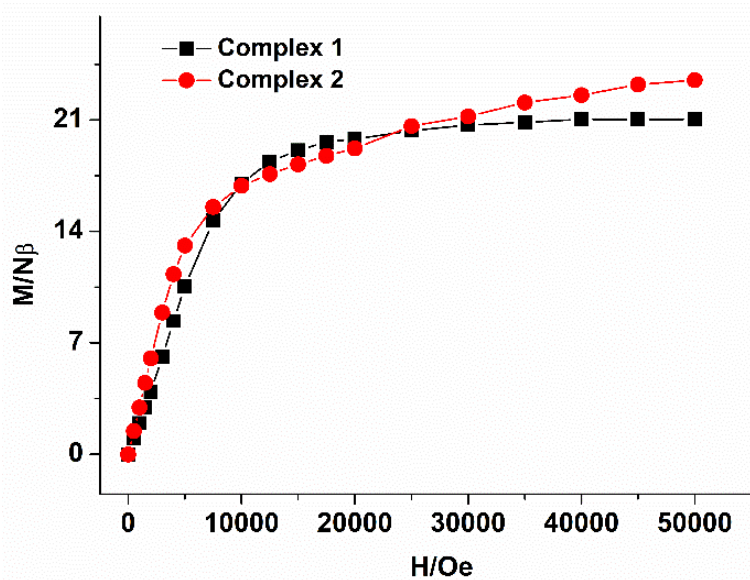

Fig. S3. The M-H curve of complexes 1 and 2 at 2 K.

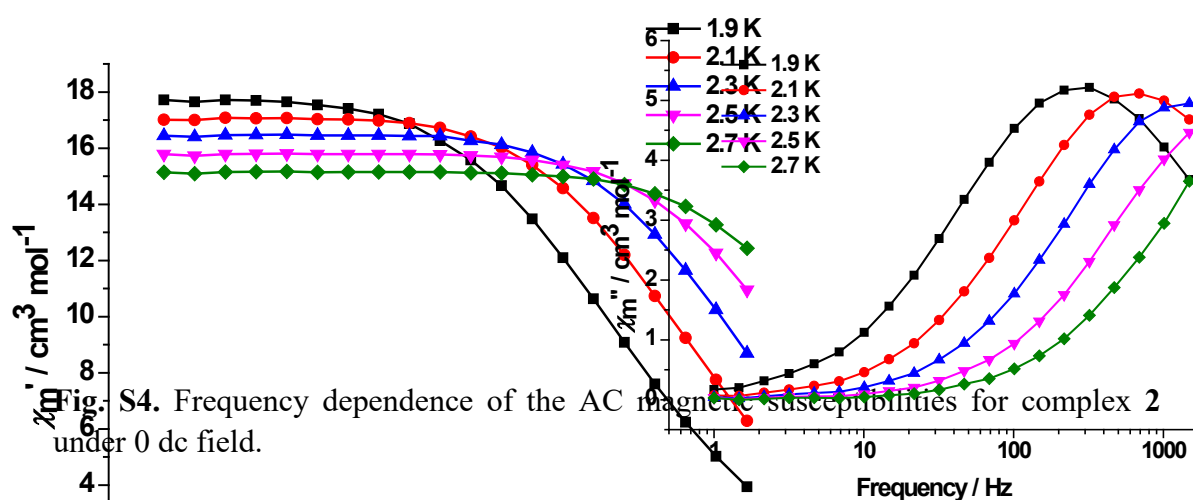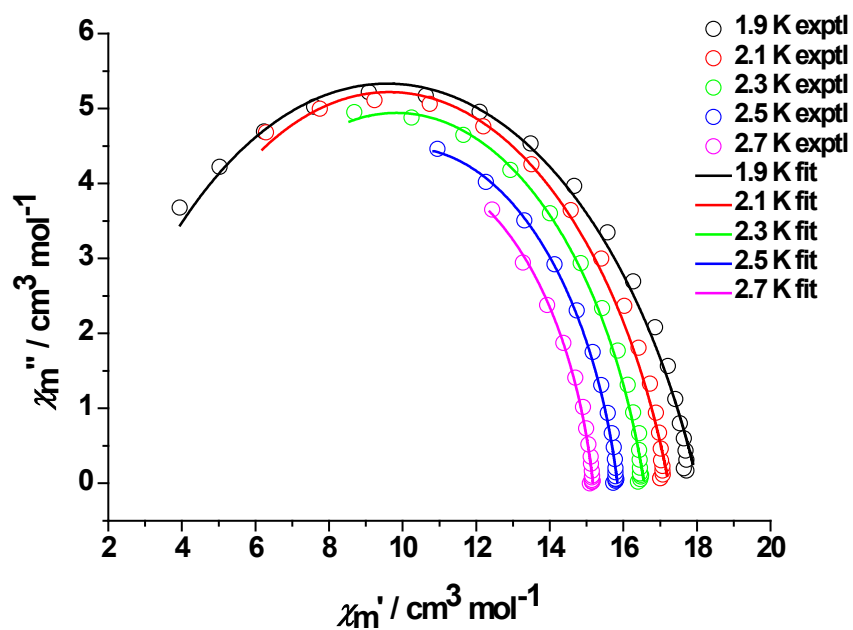

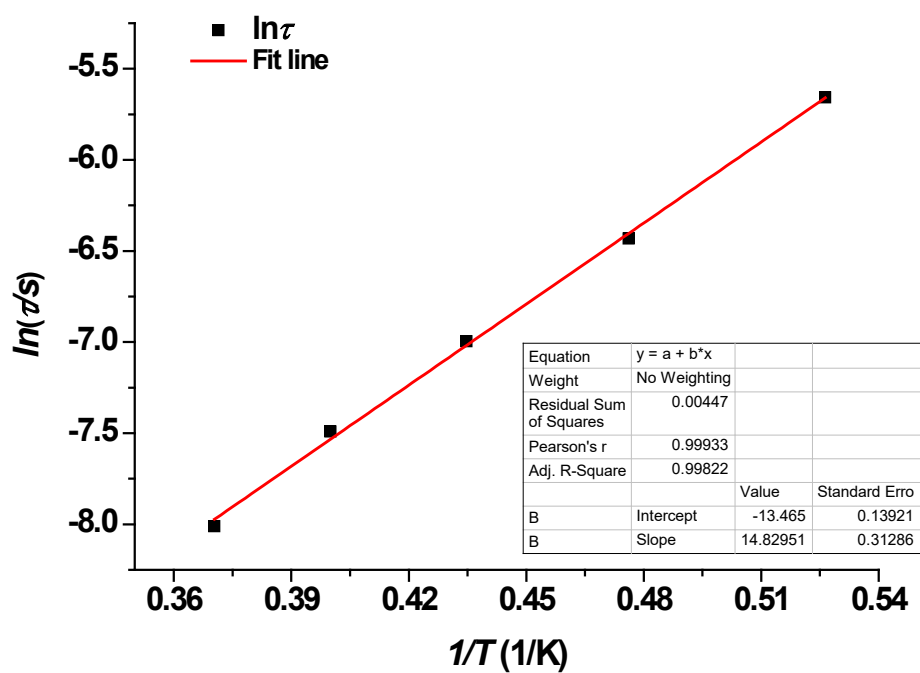

**Fig. S6.** The  $\ln(\tau)$  vs.  $T^{-1}$  plots based on the Arrhenius relationship for complex 2.

**Table S3.** Cole-Cole curve fitting parameters for complex 2.

| T / K | $\alpha$ | $\tau$                | $\chi_T$ | $\chi_S$ |
|-------|----------|-----------------------|----------|----------|
| 1.9   | 0.282    | $3.49 \times 10^{-3}$ | 18.019   | 1.152    |
| 2.1   | 0.234    | $1.61 \times 10^{-3}$ | 17.232   | 2.034    |
| 2.3   | 0.194    | $9.16 \times 10^{-4}$ | 16.566   | 3.095    |
| 2.5   | 0.155    | $5.58 \times 10^{-4}$ | 15.840   | 4.398    |
| 2.7   | 0.137    | $3.32 \times 10^{-4}$ | 15.174   | 4.753    |
